# Supplementary material
Source: PubMed Central journal article supplement (PMC2834817)
Supplement: NIHMS166765-supplement-1_si_001.pdf [file NIHMS166765-supplement-1_si_001.pdf]

Formatted: Numbering: Continuous

Deleted: For submission to J Agricultural and Food Chemistry July 20, 2009

1  
2  
3  
4  
5  
6  
7  
8  
9  
10  
11  
12  
13  
14  
15  
16  
17  
18  
19  
20  
21  
22  
23  
24  
25  
26  
27  
28  
29

**Anti-Arthritic Effects of the Essential Oils of Turmeric (*Curcuma longa* L.)**

Formatted: Font: Italic

Janet L. Funk<sup>†\*</sup>, Jennifer B. Frye<sup>†</sup>, Janice N. Oyarzo<sup>†</sup>, Huaping Zhang<sup>‡</sup>, and Barbara N. Timmermann<sup>‡</sup>

<sup>†</sup>Department of Medicine, University of Arizona, Tucson, AZ 85724, and <sup>‡</sup>Department of Medicinal Chemistry, School of Pharmacy, University of Kansas, Lawrence, KS 66045, USA

**SUPPORTING INFORMATION**

Formatted: Font: Times New Roman, Font color: Auto

Formatted: Normal, Left, Line spacing: single

Formatted: Font: 18 pt, Bold

Formatted: Centered

Formatted: Font: Times New

Formatted: Normal, Left, Line spacing: single

Deleted: <sup>†</sup>Department of Medicine, University of Arizona, Tucson, AZ 85724, and <sup>‡</sup>Department of Medicinal Chemistry, School of Pharmacy, University of Kansas, Lawrence, KS 66045, USA

To whom correspondence should be addressed:  
Janet L. Funk, MD  
Tele: (520) 626-3242  
Fax: (520) 626-3644  
Email: jfunk@u.arizona.edu

To whom correspondence should be addressed  
Janet L. Funk, MD  
Tele: (520) 626-3242  
Fax: (520) 626-3644  
Email:

Formatted: Font: 18 pt, Bold

Formatted: Font: 18 pt

Formatted: Font: 18 pt, Bold

Formatted: Font: 18 pt

Formatted: After: 18 pt

30  
31

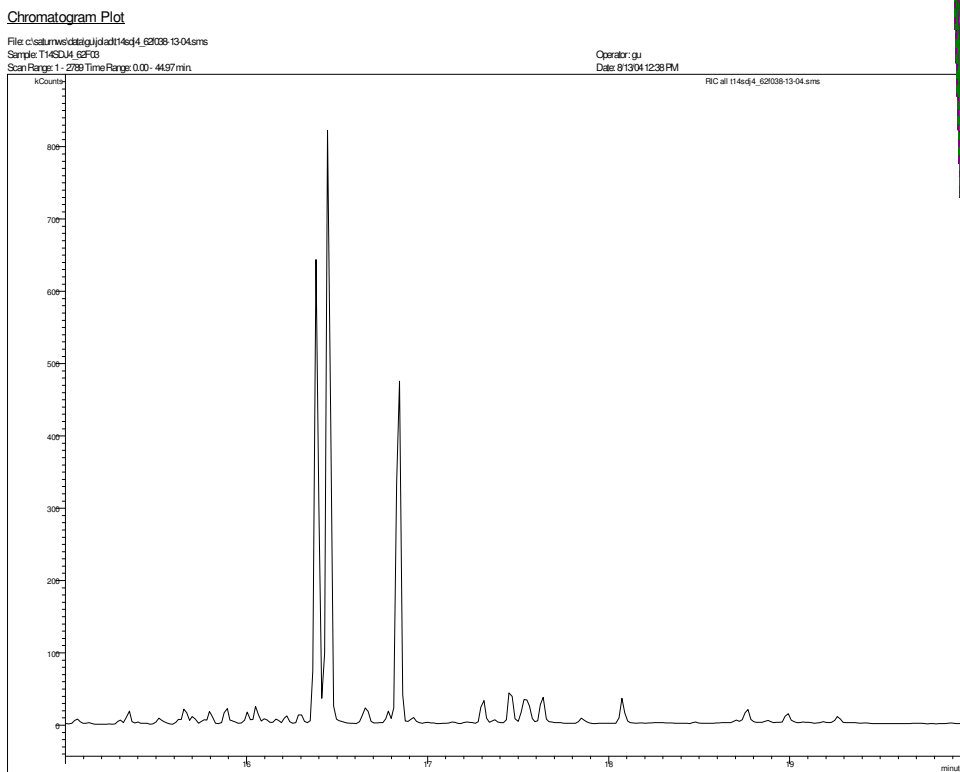

32

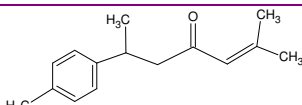

the first peak ( $R_t=16.384$  min, MW 216),  $C_{15}H_{20}O$ ,  $\alpha$ -turmerone

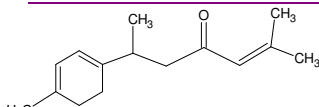

the second peak ( $R_t=16.448$  min, MW 218),  $C_{15}H_{22}O$ ,  $\alpha$ -turmerone

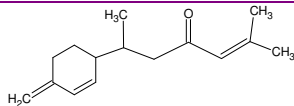

the third peak ( $R_t=16.846$  min, MW 218),  $C_{15}H_{22}O$ ,  $\beta$ -turmerone

35

36

37

38

Figure S1 A GC profile of the refined turmeric oil extract, the three main peaks are identified as  $\alpha$ -turmerone,  $\alpha$ -turmerone, and  $\beta$ -turmerone, respectively.

Deleted: For submission to J ... [1]

Deleted: [1]

Deleted: ABSTRACT [1] ... [2]

Deleted:

Deleted: Having previously ide ... [3]

Deleted: ,

Deleted: ; rheumatoid arthritis

Deleted: ,

Deleted: ;

Deleted: turmeric, essential oils,

Deleted: liver;

Deleted: ,

Deleted: anemia [1] ... [4]

Deleted: ing

Deleted: nuclear factor- $\kappa$ B (NF ... [5]

Formatted ... [6]

Deleted:

Deleted: Medicinal effects of T ... [7]

Deleted: 16,

Deleted: 17).

Deleted:

Formatted ... [8]

Formatted ... [9]

Deleted: ) (

Formatted ... [10]

Deleted: ), (

Deleted: In isolation, these cor ... [11]

Deleted:

Formatted ... [12]

Deleted: (14); inhibition of in ... [13]

Deleted:

Formatted ... [14]

Deleted: For example, when of ... [15]

Formatted ... [16]

Deleted:

Deleted: Moreover, the crude ... [17]

Deleted:

Deleted: Thus, we have postul ... [18]

Deleted:

Deleted: Because we previous ... [19]

Deleted:

Deleted: model

Deleted:

Deleted: to characterize anti- ... [20]

Deleted:

Deleted:

Formatted ... [21]

Deleted: our isolation and in v ... [22]

Deleted: ... [23]

Deleted: MATERIALS AND ... [24]

Deleted:

Deleted: Turmeric essential oi ... [25]

...

... [26]

...

... [27]

... [28]

...

... [29]

2\*

Scan 1010 from c:\saturnw\data\g\j\oladit14sdj4\_621038-13-04.sms

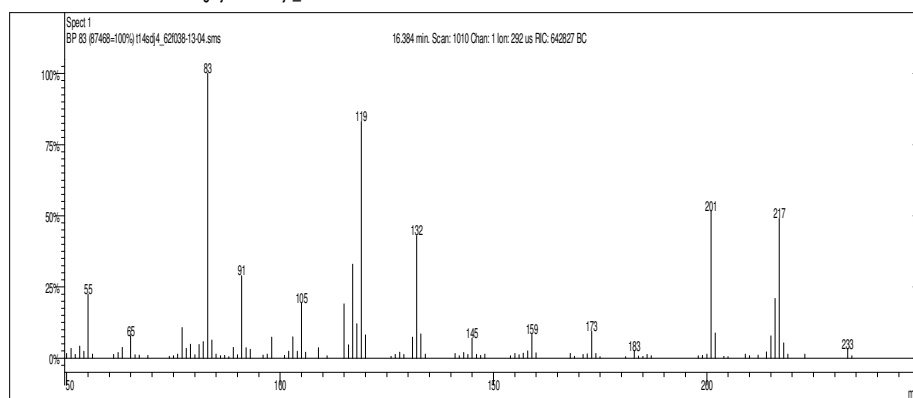

Spectrum from c:\saturnw\data\g\j\oladit14sdj4\_621038-13-04.sms  
 Scan No: 1010, Time: 16.384 minutes  
 No averaging, Background corrected  
 Comment: 16.384 min Scan: 1010 Chan: 1 Ion: 232 us RIC: 642827 BC  
 Pair Count: 116 MW: 0 Formula: None CAS No: None Acquired Range: 50-650

| Ion | Int   | %BP |
|-----|-------|-----|-----|-------|-----|-----|-------|-----|-----|-------|-----|
| 50  | 1455  | 2   | 87  | 851   | 1   | 129 | 1104  | 1   | 175 | 510   | 1   |
| 51  | 2983  | 3   | 88  | 513   | 1   | 131 | 6490  | 7   | 181 | 513   | 1   |
| 52  | 1113  | 1   | 89  | 3338  | 4   | 132 | 37667 | 43  | 183 | 2217  | 3   |
| 53  | 3669  | 4   | 90  | 1027  | 1   | 133 | 7431  | 8   | 184 | 683   | 1   |
| 54  | 2136  | 2   | 91  | 25385 | 29  | 134 | 1276  | 1   | 185 | 593   | 1   |
| 55  | 19634 | 22  | 92  | 3248  | 4   | 141 | 1452  | 2   | 186 | 1107  | 1   |
| 56  | 1228  | 1   | 93  | 2718  | 3   | 142 | 768   | 1   | 187 | 767   | 1   |
| 61  | 1113  | 1   | 96  | 932   | 1   | 143 | 1704  | 2   | 198 | 769   | 1   |
| 62  | 1709  | 2   | 97  | 1269  | 1   | 144 | 1196  | 1   | 199 | 851   | 1   |
| 63  | 3332  | 4   | 98  | 6418  | 7   | 145 | 6151  | 7   | 200 | 1284  | 1   |
| 65  | 6828  | 8   | 101 | 855   | 1   | 146 | 1108  | 1   | 201 | 45283 | 52  |
| 66  | 1021  | 1   | 102 | 2140  | 2   | 147 | 846   | 1   | 202 | 7703  | 9   |
| 67  | 995   | 1   | 103 | 6585  | 8   | 148 | 1280  | 1   | 204 | 599   | 1   |
| 69  | 815   | 1   | 104 | 2135  | 2   | 154 | 770   | 1   | 205 | 512   | 1   |
| 74  | 593   | 1   | 105 | 17014 | 19  | 155 | 1455  | 2   | 209 | 1271  | 1   |
| 75  | 768   | 1   | 106 | 1791  | 2   | 156 | 1025  | 1   | 210 | 769   | 1   |
| 76  | 1278  | 1   | 109 | 3235  | 4   | 157 | 1536  | 2   | 212 | 940   | 1   |
| 77  | 9378  | 11  | 111 | 762   | 1   | 158 | 2225  | 3   | 214 | 1966  | 2   |
| 78  | 2985  | 3   | 115 | 16677 | 19  | 159 | 7255  | 8   | 215 | 6846  | 8   |
| 79  | 4256  | 5   | 116 | 4104  | 5   | 160 | 1625  | 2   | 216 | 18407 | 21  |
| 80  | 1024  | 1   | 117 | 28844 | 33  | 168 | 1453  | 2   | 217 | 42975 | 49  |
| 81  | 4167  | 5   | 118 | 10615 | 12  | 169 | 598   | 1   | 218 | 4707  | 5   |
| 82  | 5124  | 6   | 119 | 72756 | 83  | 171 | 1196  | 1   | 219 | 1284  | 1   |
| 83  | 87468 | 100 | 120 | 7188  | 8   | 172 | 1369  | 2   | 223 | 1198  | 1   |
| 84  | 5558  | 6   | 126 | 599   | 1   | 173 | 8215  | 9   | 233 | 2910  | 3   |
| 85  | 1272  | 1   | 127 | 1197  | 1   | 174 | 1454  | 2   | 234 | 770   | 1   |
| 86  | 767   | 1   | 128 | 1879  | 2   |     |       |     |     |       |     |

39  
40  
41

**Figure S1, B** GC-MS fragments of the peak one with retention time 16.384 min

**Formatted:** Font: Bold

**Formatted:** Font: Bold

**Formatted:** After: 18 pt

Deleted: For submission to J Agricultural and Food Chemistry July 20, 2009

Entry 45357 from MAINLIB NIST Library

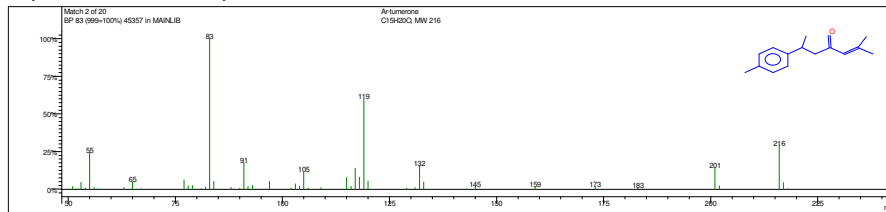

Spectrum 45357 from MAINLIB Library  
Name: Ar-turmerone  
Pair Count: 59 MW: 216 Formula: C19H20O CAS No: None Acquired Range: 39-218  
NIST No: 20270  
Contributor: R.H. Herold ET AL. J.Chrom. 74(5)(1988)  
Synonyms: None  
Other Substances: None  
Replicates: None

| Ion | Int. | Rel. Int. | Ion | Int. | Rel. Int. | Ion | Int. | Rel. Int. |
|-----|------|-----------|-----|------|-----------|-----|------|-----------|
| ... | ...  | 100       | 83  | 999  | 100       | 118 | 79   | 8         |
| 50  | 1    | 0         | 84  | 52   | 5         | 119 | 597  | 60        |
| 51  | 19   | 2         | 88  | 12   | 1         | 120 | 53   | 5         |
| 52  | 3    | 0         | 90  | 6    | 1         | 129 | 7    | 1         |
| 53  | 45   | 5         | 91  | 177  | 18        | 131 | 10   | 1         |
| 54  | 7    | 1         | 92  | 18   | 2         | 132 | 157  | 16        |
| 55  | 243  | 24        | 93  | 25   | 3         | 133 | 48   | 5         |
| 56  | 11   | 1         | 96  | 1    | 0         | 134 | 1    | 0         |
| 57  | 2    | 0         | 97  | 52   | 5         | 143 | 2    | 0         |
| 63  | 12   | 1         | 98  | 1    | 0         | 145 | 17   | 2         |
| 65  | 47   | 5         | 102 | 8    | 1         | 159 | 16   | 2         |
| 66  | 1    | 0         | 103 | 35   | 4         | 173 | 17   | 2         |
| 67  | 3    | 0         | 104 | 21   | 2         | 183 | 9    | 1         |
| 69  | 1    | 0         | 105 | 112  | 11        | 201 | 141  | 14        |
| 77  | 62   | 6         | 106 | 7    | 1         | 202 | 22   | 2         |
| 78  | 22   | 2         | 109 | 9    | 1         | 216 | 290  | 29        |
| 79  | 24   | 2         | 115 | 78   | 8         | 217 | 44   | 4         |
| 81  | 4    | 0         | 116 | 18   | 2         | 218 | 3    | 0         |
| 82  | 13   | 1         | 117 | 140  | 14        |     |      |           |

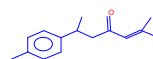

42  
43

GC-MS data of ar-turmerone from NIST08 library

Deleted: tumerone

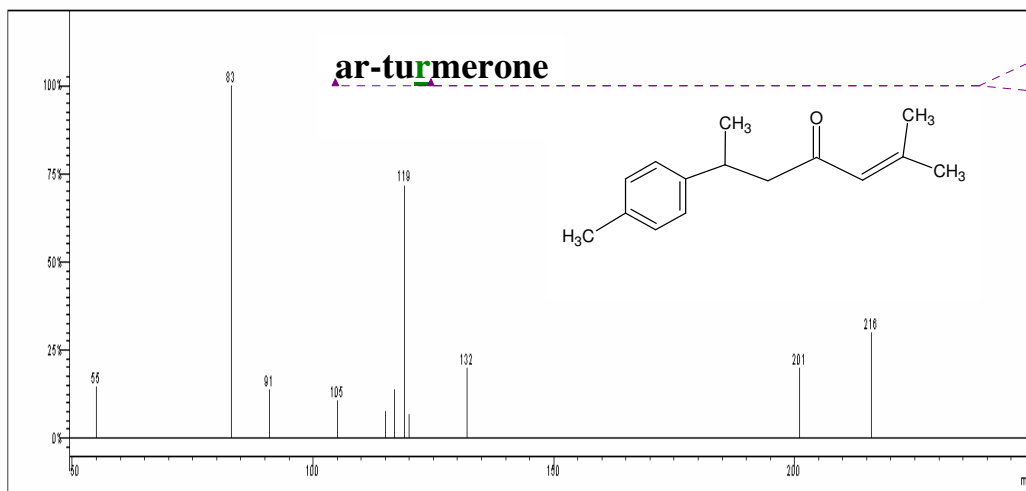

Formatted: Font color: Auto

Formatted: Font color: Auto

44  
45  
46  
47  
48  
49

GC-MS data of ar-turmerone from reference 23

Deleted: tumerone

Figure S1 C GC-MS fragments of ar-turmerone in the NIST08 library and in reference 23

Deleted: tumerone

Formatted: After: 18 pt

50

Scan 1014 from c:\saturms\data\guj\oladit14s\j4\_62f038-13-04.sms

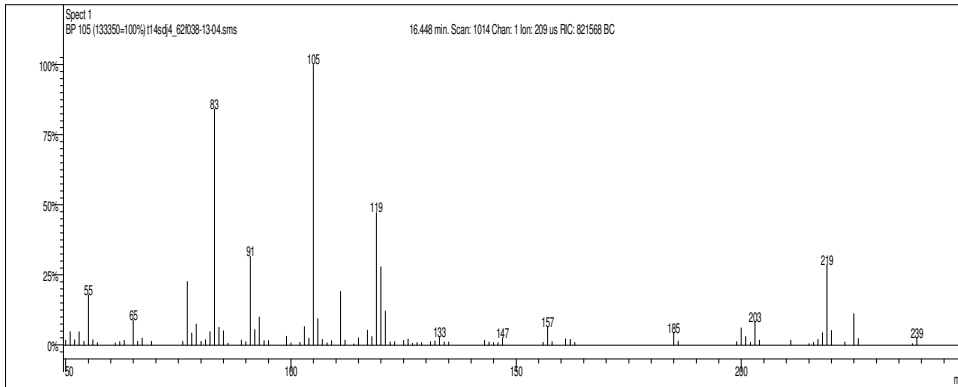

Spectrum from c:\saturms\data\guj\oladit14s\j4\_62f038-13-04.sms  
Scan No: 1014, Time: 16.448 minutes  
No averaging, Background corrected  
Comment: 16.448 min. Scan: 1014 Chan: 1 Ion: 209 us RIC: 821588 BC  
Pair Count: 95 MW: 0 Formula None CAS No None Acquired Range: 50-650

| Ion | Int    | %BP | Ion | Int    | %BP | Ion | Int   | %BP | Ion | Int   | %BP |
|-----|--------|-----|-----|--------|-----|-----|-------|-----|-----|-------|-----|
| 50  | 2272   | 2   | 85  | 6806   | 5   | 118 | 4065  | 3   | 161 | 2977  | 2   |
| 51  | 6326   | 5   | 86  | 834    | 1   | 119 | 62901 | 47  | 162 | 2628  | 2   |
| 52  | 2511   | 2   | 89  | 2271   | 2   | 120 | 37197 | 28  | 163 | 1313  | 1   |
| 53  | 6327   | 5   | 90  | 1555   | 1   | 121 | 16128 | 12  | 185 | 5616  | 4   |
| 54  | 1670   | 1   | 91  | 42301  | 32  | 122 | 1428  | 1   | 186 | 1907  | 1   |
| 55  | 23746  | 18  | 92  | 7411   | 6   | 123 | 1542  | 1   | 199 | 1550  | 1   |
| 56  | 2491   | 2   | 93  | 13376  | 10  | 125 | 2151  | 2   | 200 | 8133  | 6   |
| 57  | 1188   | 1   | 94  | 2024   | 2   | 126 | 2751  | 2   | 201 | 4058  | 3   |
| 61  | 956    | 1   | 95  | 2248   | 2   | 127 | 836   | 1   | 202 | 1313  | 1   |
| 62  | 1552   | 1   | 99  | 4186   | 3   | 128 | 1192  | 1   | 203 | 10884 | 8   |
| 63  | 2265   | 2   | 100 | 956    | 1   | 129 | 1067  | 1   | 204 | 2272  | 2   |
| 65  | 11701  | 9   | 102 | 1315   | 1   | 131 | 1539  | 1   | 211 | 2265  | 2   |
| 66  | 1668   | 1   | 103 | 8725   | 7   | 132 | 1909  | 1   | 215 | 714   | 1   |
| 67  | 3317   | 2   | 104 | 3224   | 2   | 133 | 3571  | 3   | 216 | 1315  | 1   |
| 69  | 1753   | 1   | 105 | 133350 | 100 | 134 | 1427  | 1   | 217 | 2627  | 2   |
| 76  | 1788   | 1   | 106 | 12553  | 9   | 135 | 1419  | 1   | 218 | 5860  | 4   |
| 77  | 30224  | 23  | 107 | 2614   | 2   | 143 | 2145  | 2   | 219 | 38157 | 29  |
| 78  | 5730   | 4   | 108 | 949    | 1   | 144 | 1433  | 1   | 220 | 6937  | 5   |
| 79  | 10023  | 8   | 109 | 2015   | 2   | 145 | 1183  | 1   | 223 | 1435  | 1   |
| 80  | 1671   | 1   | 111 | 25470  | 19  | 146 | 1071  | 1   | 225 | 14829 | 11  |
| 81  | 2483   | 2   | 112 | 2272   | 2   | 147 | 3339  | 3   | 226 | 3110  | 2   |
| 82  | 6327   | 5   | 114 | 597    | 0   | 156 | 1313  | 1   | 238 | 717   | 1   |
| 83  | 112168 | 84  | 115 | 3450   | 3   | 157 | 8368  | 6   | 239 | 3229  | 2   |
| 84  | 8485   | 6   | 117 | 7049   | 5   | 158 | 1554  | 1   |     |       |     |

51  
52  
53

Figure S1 D GC-MS fragments of the peak two with retention time 16.448 min

Formatted: After: 18 pt

5

54

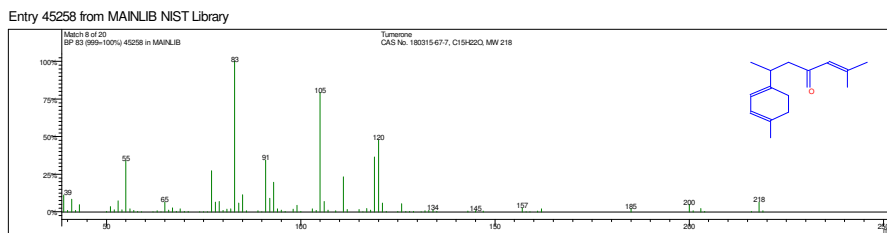

Spectrum 45258 from MAINLIB Library  
 Name: Turmerone  
 Pair Count: 91 MW: 218 Formula: C19H22O CAS No: 180315-67-7 Acquired Range: 39- 219  
 NIST No: 22271  
 Contributor: R.Hesrot ET AL J.Chrom 74(5)(1988)  
 Synonyms: 1  
 2-Methyl-6-(4-methyl-1,3-cyclohexadien-1-yl)-2-hepten-4-one #  
 Other Databases: None  
 Replicates: None

| Ion | Int | Ion | Int | Ion | Int | Ion | Int |
|-----|-----|-----|-----|-----|-----|-----|-----|
| 39  | 112 | 11  | 80  | 9   | 1   | 119 | 365 |
| 40  | 9   | 1   | 81  | 18  | 2   | 120 | 476 |
| 41  | 84  | 8   | 82  | 21  | 2   | 121 | 58  |
| 42  | 10  | 1   | 83  | 999 | 100 | 122 | 2   |
| 43  | 48  | 5   | 84  | 59  | 6   | 125 | 3   |
| 50  | 3   | 0   | 85  | 114 | 11  | 126 | 53  |
| 51  | 35  | 4   | 86  | 7   | 1   | 127 | 3   |
| 52  | 13  | 1   | 89  | 7   | 1   | 128 | 3   |
| 53  | 73  | 7   | 90  | 1   | 0   | 129 | 3   |
| 54  | 14  | 1   | 91  | 344 | 34  | 131 | 1   |
| 55  | 340 | 34  | 92  | 90  | 9   | 132 | 8   |
| 56  | 21  | 2   | 93  | 197 | 20  | 133 | 9   |
| 57  | 10  | 1   | 94  | 20  | 2   | 134 | 11  |
| 58  | 2   | 0   | 95  | 12  | 1   | 135 | 3   |
| 59  | 1   | 0   | 96  | 3   | 0   | 143 | 5   |
| 62  | 1   | 0   | 98  | 18  | 2   | 145 | 7   |
| 63  | 8   | 1   | 99  | 44  | 4   | 147 | 5   |
| 64  | 1   | 0   | 100 | 3   | 0   | 157 | 25  |
| 65  | 65  | 7   | 103 | 21  | 2   | 158 | 1   |
| 66  | 11  | 1   | 104 | 10  | 1   | 159 | 1   |
| 67  | 27  | 3   | 105 | 793 | 79  | 161 | 5   |
| 68  | 3   | 0   | 106 | 68  | 7   | 162 | 20  |
| 69  | 21  | 2   | 107 | 11  | 1   | 185 | 20  |
| 70  | 4   | 0   | 109 | 8   | 1   | 200 | 49  |
| 71  | 3   | 0   | 111 | 232 | 23  | 201 | 7   |
| 74  | 1   | 0   | 112 | 15  | 2   | 203 | 23  |
| 75  | 1   | 0   | 115 | 15  | 2   | 204 | 3   |
| 76  | 1   | 0   | 116 | 1   | 0   | 216 | 2   |
| 77  | 273 | 27  | 117 | 23  | 2   | 218 | 64  |
| 78  | 64  | 6   | 118 | 12  | 1   | 219 | 8   |
| 79  | 69  | 7   |     |     |     |     |     |

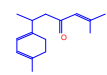

55

56

GC-MS Data of  $\alpha$ -turmerone from NIST08 library

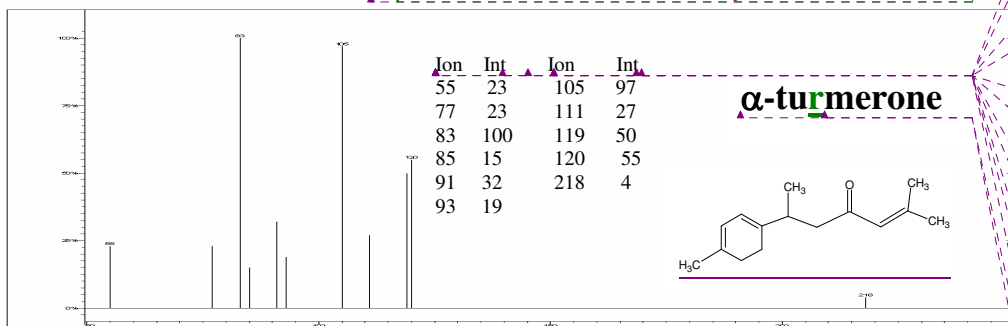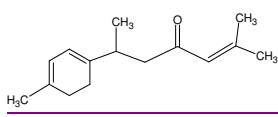

57

58

59

60

61

62

63

GC-MS data of  $\alpha$ -turmerone from reference 23

**Figure S1 E** GC-MS fragments of  $\alpha$ -turmerone in the NIST08 library and in literature

**Formatted:** Font: 12 pt, Not Bold, Complex Script Font: 12 pt

**Formatted:** Centered

**Deleted:** turmerone

**Formatted:** Font color: Auto

**Formatted:** Font: Not Bold, Font color: Auto

**Formatted:** Font color: Auto

**Formatted:** Font: Not Bold, Font color: Auto

**Formatted:** Font color: Auto

**Formatted:** Font: Not Bold, Font color: Auto

**Formatted:** Font color: Auto

**Formatted:** Font: Not Bold, Font color: Auto

**Formatted:** Font color: Auto

**Formatted:** Font: Not Bold, Font color: Auto

**Formatted:** Font color: Auto

**Formatted:** Font color: Auto

**Formatted:** Font color: Auto

**Formatted:** Font: 12 pt, Complex Script Font: 12 pt

**Deleted:** turmerone

**Formatted:** Font: 12 pt, Complex Script Font: 12 pt

**Deleted:** turmerone

**Formatted:** After: 18 pt

Scan 1039 from c:\satumwsl\data\guijolad114sqj4\_62f038-13-04.sms

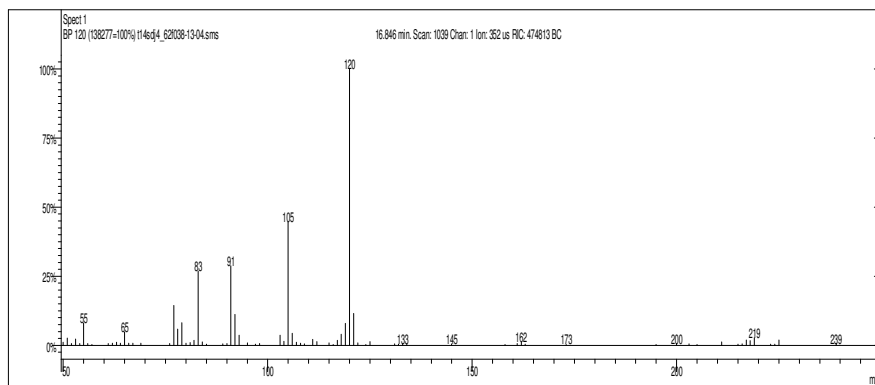

Spectrum from c:\satumwsl\data\guijolad114sqj4\_62f038-13-04.sms

Scan No 1039, Time: 16.846 minutes

No averaging, Background corrected

Comment: 16.846 min, Scan: 1039, Chan: 1, Ion: 352, us FIC: 474813 BC

Pair Count: 77, MW: 0, Formula: None, CAS: No, None, Acquired Range: 50 - 650

| Ion | Int   | %BP | Ion | Int   | %BP | Ion | Int    | %BP | Ion | Int  | %BP |
|-----|-------|-----|-----|-------|-----|-----|--------|-----|-----|------|-----|
| 50  | 1491  | 1   | 80  | 1132  | 1   | 108 | 1056   | 1   | 158 | 425  | 0   |
| 51  | 3680  | 3   | 81  | 1461  | 1   | 109 | 691    | 0   | 161 | 838  | 1   |
| 52  | 994   | 1   | 82  | 2473  | 2   | 111 | 3043   | 2   | 162 | 1488 | 1   |
| 53  | 3183  | 2   | 83  | 37109 | 27  | 112 | 1846   | 1   | 163 | 636  | 0   |
| 54  | 919   | 1   | 84  | 1768  | 1   | 115 | 1187   | 1   | 173 | 421  | 0   |
| 55  | 11163 | 8   | 85  | 556   | 0   | 116 | 491    | 0   | 195 | 424  | 0   |
| 56  | 855   | 1   | 89  | 709   | 1   | 117 | 2547   | 2   | 200 | 923  | 1   |
| 57  | 441   | 0   | 90  | 923   | 1   | 118 | 5538   | 4   | 203 | 780  | 1   |
| 61  | 852   | 1   | 91  | 39799 | 29  | 119 | 11061  | 8   | 205 | 425  | 0   |
| 62  | 1062  | 1   | 92  | 15547 | 11  | 120 | 138277 | 100 | 211 | 1767 | 1   |
| 63  | 1484  | 1   | 93  | 5020  | 4   | 121 | 15958  | 12  | 215 | 636  | 0   |
| 64  | 1136  | 1   | 95  | 1181  | 1   | 122 | 1199   | 1   | 216 | 781  | 1   |
| 65  | 6726  | 5   | 97  | 623   | 0   | 124 | 491    | 0   | 217 | 2693 | 2   |
| 66  | 1129  | 1   | 98  | 920   | 1   | 125 | 1843   | 1   | 218 | 2413 | 2   |
| 67  | 1103  | 1   | 103 | 5106  | 4   | 131 | 693    | 1   | 219 | 3764 | 3   |
| 69  | 1024  | 1   | 104 | 2053  | 1   | 132 | 563    | 0   | 223 | 568  | 0   |
| 76  | 988   | 1   | 105 | 61764 | 45  | 133 | 762    | 1   | 224 | 568  | 0   |
| 77  | 19916 | 14  | 106 | 6029  | 4   | 134 | 559    | 0   | 225 | 2624 | 2   |
| 78  | 8084  | 6   | 107 | 1544  | 1   | 145 | 697    | 1   | 239 | 852  | 1   |
| 79  | 11338 | 8   |     |       |     |     |        |     |     |      |     |

64  
65  
66

**Figure S1 F** GC-MS fragments of the peak three with retention time 16.846 min

Deleted: For submission to J Agricultural and Food Chemistry July 20, 2009

Deleted: <sp>

Deleted: Entry 82155

Deleted: CAS No. 87440-60-6,

Deleted: Curhone

from MAINLIB NIST Library

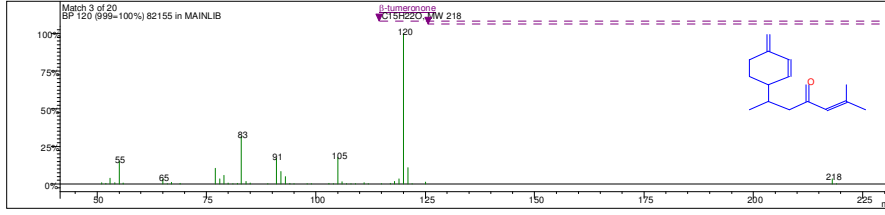

Name:  $\beta$ -turmerone  
Pair Count: 48 MW: 218 Formula: C15H22O

| Ion | Int | %BP | Ion | Int | %BP | Ion | Int | %BP |
|-----|-----|-----|-----|-----|-----|-----|-----|-----|
| 55  | 10  | 1   | 83  | 317 | 32  | 107 | 3   | 0   |
| 52  | 6   | 1   | 84  | 19  | 2   | 108 | 3   | 0   |
| 53  | 38  | 4   | 85  | 7   | 1   | 111 | 10  | 1   |
| 54  | 10  | 1   | 89  | 2   | 0   | 112 | 4   | 0   |
| 55  | 152 | 15  | 91  | 171 | 17  | 115 | 4   | 0   |
| 56  | 7   | 1   | 92  | 84  | 8   | 117 | 6   | 1   |
| 65  | 33  | 3   | 93  | 50  | 5   | 118 | 17  | 2   |
| 66  | 4   | 0   | 94  | 6   | 1   | 119 | 34  | 3   |
| 67  | 11  | 1   | 95  | 3   | 0   | 120 | 999 | 100 |
| 69  | 6   | 1   | 98  | 4   | 0   | 121 | 109 | 11  |
| 77  | 103 | 6   | 100 | 3   | 0   | 122 | 3   | 0   |
| 78  | 35  | 4   | 103 | 6   | 1   | 125 | 12  | 1   |
| 79  | 59  | 6   | 104 | 3   | 0   | 218 | 35  | 4   |
| 80  | 7   | 1   | 105 | 177 | 18  | 219 | 3   | 0   |
| 81  | 3   | 0   | 106 | 14  | 1   |     |     |     |

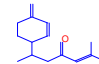

Deleted: Curhone

Deleted: CAS No: 87440-60-6  
Acquired Range: 39 - 219

67  
68

### GC-MS Data of $\beta$ -turmerone from NIST08 library

Deleted: turmerone

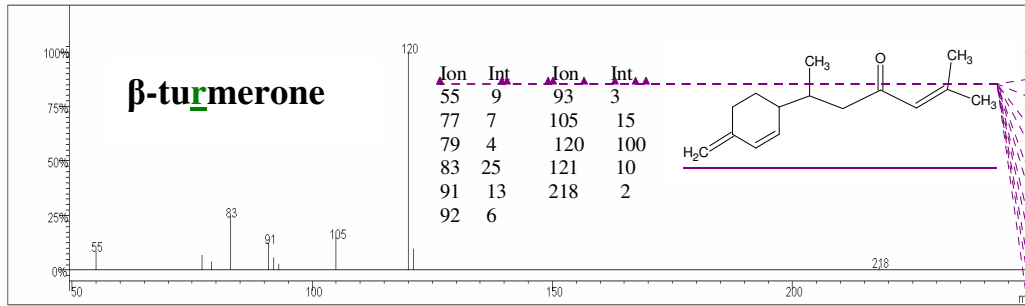

Formatted: Font color: Auto

Formatted: Font: Not Bold, Font color: Auto

Formatted: Font color: Auto

Formatted: Font: Not Bold, Font color: Auto

Formatted: Font color: Auto

Formatted: Font: Not Bold, Font color: Auto

Formatted: Font color: Auto

Formatted: Font: Not Bold, Font color: Auto

Formatted: Font color: Auto

Formatted: Font: Not Bold, Font color: Auto

Formatted: Font color: Auto

Deleted: turmerone

Deleted: turmerone

69  
70  
71  
72  
73  
74  
75  
76  
77  
78  
79  
80  
81  
82  
83  
84  
85  
86

### GC-MS data of $\beta$ -turmerone from reference 23

Figure S1 G GC-MS fragments of  $\beta$ -turmerone in the NIST08 library and in literature

Formatted: After: 18 pt



**Deleted:** For submission to J Agricultural and Food Chemistry¶ July 20, 2009

**Deleted:** <sp>...¶ A¶ B¶ ... [33]

**Formatted:** Font: Bold

**Formatted:** Line spacing: Double

**Formatted:** Font: Not Bold

**Deleted:** s

**Deleted:** crude (A) and

**Formatted:** Font: Not Bold

**Deleted:** (B)

**Formatted:** Font: Bold

**Deleted:** ¶ Note¶ (1)

**Deleted:** in both extracts

**Formatted:** Font: Not Bold

**Deleted:** tumerone...tumerone...tumerone...tumerone...tumerone...tumerone...¶ (2) ...is ... [34]

**Deleted:** (B).

**Deleted:** Literature Cited¶ Pichersky, E. and Gang, D.R. Genetics and biochemistry of secondary metabolites in plants: an evolutionary perspective. Trends Plant Sci. 2000, 5, 439-445.¶ Lantz, R.C.; Chen, G.J.; Solyom, A.M.; Jolad, S.D.; Timmermann, B.N. The effect of turmeric extracts on inflammatory mediator production. Phytomedicine 2005, 12, 445-452.¶ Funk, J.L.; Frye, J.B.; Oyarzo, J.N.; Kuscuoglu, N.; Wilson, J.; McCaffrey, G.; Stafford, G.; Chen, G.; Lantz, R.C.; Jolad, S.D.; Solyom, A.M.; Kiela, P.R.; Timmermann, B.N. Efficacy and mechanism of action of turmeric supplements in the treatment of experimental arthritis. Arthritis Rheum. 2006, 54, 3452-3464.¶ Funk, J.L.; Oyarzo, J.N.; Frye, J.B.; Chen, G.; Lantz, R.C.; Jolad, S.D.; Solyom, A.M.; Timmermann, B.N. Turmeric extracts containing curcuminoids prevent experimental rheumatoid arthritis. J. Nat. Prod. 2006, 69, 351-355.¶ Chainani-Wu, N. Safety and anti-inflammatory activity of curcumin: a component of tumeric (Curcuma longa). J. Altern. Complement. Med. 2006, 12, 115-121.¶ ... [35]

**Formatted:** After: 18 pt

87  
88  
89  
90  
91  
92  
93  
94  
95

**FIGURE S2**

**Figure S2. HPLC-UV profile of refined TEO. The three major compounds have strong absorption (>1250 mA in  $\lambda=250$  nm), implying they are the main components and have conjugated functional groups such as  in turmerones. These three compounds are  $\beta$ -turmerone,  $\alpha$ -turmerone, and ar-turmerone, respectively, consistent with the GC-MS results such as the ar-turmerone has strong absorption (280 nm). There are no curcuminoids in the refined TEO.**

For submission to J Agricultural and Food Chemistry  
July 20, 2009

## ABSTRACT

Turmeric (*Curcuma longa* L., Zingiberaceae) rhizomes contain two classes of secondary metabolites, curcuminoids and the less well-studied essential oils.

Having previously identified potent anti-arthritic effects of the curcuminoids in turmeric extracts in an animal model of rheumatoid arthritis (RA), studies were undertaken to determine whether the turmeric essential oils (TEO) were also joint protective using the same experimental model. Crude or refined TEO extracts dramatically inhibited joint swelling (90-100% inhibition) in female rats with streptococcal cell wall (SCW)-induced arthritis when extracts were administered via intraperitoneal injection to maximize uniform delivery. However, this anti-arthritic effect was accompanied by significant morbidity and mortality. Oral administration of a 20-fold higher dose TEO was non-toxic, but only mildly joint-protective (20% inhibition). These results do not support the isolated use of TEO for arthritis treatment, but, instead, identify potential safety concerns in vertebrates exposed to TEO.

**Key Words:** *Curcuma longa* L.; turmeric; essential oil; arthritis

anemia

-----Page Break-----

## INTRODUCTION

Essential oils are complex mixtures of volatile terpenes selected throughout evolution to protect plants from external threats by various means including mimicking endogenous substrates in herbivores (1). While biologic and potentially medicinal effects of these essential oils are thus to be anticipated, these compounds are often less well studied than other classes of secondary plant metabolites, with polyphenols being a prominent example. Such is the case for turmeric (*Curcuma longa* L., Zingiberaceae), a medicinal botanical whose rhizome contains two major classes of secondary metabolites, the phenolic curcuminoids and the hydrophobic essential oils (2). Many laboratories, including our own (3, 4), have demonstrated potent and physiologically important effects of the curcuminoids (5). For example, we have elucidated a profound anti-arthritic effect of curcuminoid-containing turmeric extracts due to their ability to inhibit

**Page 2: [5] Deleted** **Office 2004 Test Drive User** **8/3/2009 12:06:00 PM**

nuclear factor- $\kappa$ B (NF- $\kappa$ B) activation in experimental rheumatoid arthritis, thus blocking multiple downstream signaling pathways critical to joint inflammation, including cyclooxygenase (COX)-stimulated prostaglandin-E<sub>2</sub> (PGE<sub>2</sub>) production (3). Far less studied, and indeed, often discarded in the preparation of turmeric dietary supplements (AR), are turmeric's essential oils.

Reported biologic properties of the multi-component essential oils of turmeric include antifungal (6), mosquitocidal (7), antivenom (8), antibacterial and antioxidant properties (9, 10).

**Page 2: [6] Formatted** **hankzhang** **7/22/2009 12:26:00 PM**

Font: Italic

**Page 2: [6] Formatted** **hankzhang** **7/22/2009 12:26:00 PM**

Font: Italic

**Page 2: [6] Formatted** **hankzhang** **7/22/2009 12:26:00 PM**

Font: Italic

**Page 2: [6] Formatted** **hankzhang** **7/22/2009 12:26:00 PM**

Font: Italic

**Page 2: [6] Formatted** **hankzhang** **7/22/2009 12:27:00 PM**

Font: Italic

**Page 2: [6] Formatted** **hankzhang** **7/22/2009 12:27:00 PM**

Font: Italic

**Page 2: [7] Deleted** **Office 2004 Test Drive User** **8/3/2009 12:06:00 PM**

Medicinal effects of TEO in vertebrates have also been reported for stroke and diabetes: a single acute dose of TEO (250-500 mg/kg oral or ip) was neuroprotective in rats subjected to occlusive or embolic strokes (11-13), while chronic TEO dietary supplementation ( $\geq$ 620 mg/kg/d) normalized serum glucose in diabetic mice (14, 15).

Major compounds present in turmeric essential oils (TEO) include  $\alpha$ -turmerone and  $\beta$ -turmerone. The relative proportions of these terpenoids in TEO extracts vary depending on the rhizome's geographic origin and method of extraction (9,

**Page 2: [8] Formatted**                      **hankzhang**                      **7/22/2009 12:26:00 PM**  
 Font: Italic

**Page 2: [8] Formatted**                      **hankzhang**                      **7/22/2009 12:26:00 PM**  
 Font: Italic

**Page 2: [8] Formatted**                      **hankzhang**                      **7/22/2009 12:26:00 PM**  
 Font: Italic

**Page 2: [8] Formatted**                      **hankzhang**                      **7/22/2009 12:26:00 PM**  
 Font: Italic

**Page 2: [8] Formatted**                      **hankzhang**                      **7/22/2009 12:26:00 PM**  
 Font: Italic

**Page 2: [9] Formatted**                      **hankzhang**                      **7/22/2009 12:27:00 PM**  
 Font: Italic

**Page 2: [9] Formatted**                      **hankzhang**                      **7/22/2009 12:27:00 PM**  
 Font: Italic

**Page 2: [9] Formatted**                      **hankzhang**                      **7/22/2009 12:27:00 PM**  
 Font: Italic

**Page 2: [9] Formatted**                      **hankzhang**                      **7/22/2009 12:27:00 PM**  
 Font: Italic

**Page 2: [9] Formatted**                      **hankzhang**                      **7/22/2009 12:27:00 PM**  
 Font: Italic

**Page 2: [9] Formatted**                      **hankzhang**                      **7/22/2009 12:27:00 PM**  
 Font: Italic

**Page 2: [10] Formatted**                      **hankzhang**                      **7/22/2009 12:27:00 PM**  
 Font: Italic

**Page 2: [11] Deleted**                      **Office 2004 Test Drive User**                      **8/3/2009 12:06:00 PM**  
 In isolation, these compounds have demonstrated bioactivity *in vitro*, including cytotoxic and apoptotic effects in various cells (18, 19); binding to the nuclear receptor, peroxisome proliferator-activated receptor  $\gamma$  (PPAR- $\gamma$ )

**Page 2: [12] Formatted**                      **hankzhang**                      **7/22/2009 12:28:00 PM**  
 Font: Italic

**Page 2: [12] Formatted**                      **hankzhang**                      **7/22/2009 12:28:00 PM**  
 Font: Italic

**Page 2: [13] Deleted**                      **Office 2004 Test Drive User**                      **8/3/2009 12:06:00 PM**  
 (14); inhibition of inducible PGE<sub>2</sub> and NO production (2, 20, 21); and inhibition of

platelet aggregation (22).

Emerging *in vitro* evidence from our laboratories and others suggests that crude, multi-component hexane extracts of TEO may be more bioactive than any of their individual fractions or components (2, 9, 11).

**Page 2: [14] Formatted**                      **hankzhang**                      **7/22/2009 12:28:00 PM**

Font: Italic

**Page 2: [14] Formatted**                      **hankzhang**                      **7/22/2009 12:28:00 PM**

Font: Italic

**Page 2: [14] Formatted**                      **hankzhang**                      **7/22/2009 12:28:00 PM**

Font: Italic

**Page 2: [14] Formatted**                      **hankzhang**                      **7/22/2009 12:28:00 PM**

Font: Italic

**Page 2: [14] Formatted**                      **hankzhang**                      **7/22/2009 12:28:00 PM**

Font: Italic

**Page 2: [14] Formatted**                      **hankzhang**                      **7/22/2009 12:28:00 PM**

Font: Italic

**Page 2: [14] Formatted**                      **hankzhang**                      **7/22/2009 12:28:00 PM**

Font: Italic

**Page 2: [14] Formatted**                      **hankzhang**                      **7/22/2009 12:28:00 PM**

Font: Italic

**Page 2: [15] Deleted**                      **Office 2004 Test Drive User**                      **8/3/2009 12:06:00 PM**

For example, when our laboratories isolated and compared the efficacy of 8 distinct fractions of a crude TEO extract vs. the extract itself in blocking COX-mediated PGE<sub>2</sub> production *in vitro*, the potency of the crude TEO extract exceeded that of each of its fractions (2).

**Page 2: [16] Formatted**                      **hankzhang**                      **7/22/2009 12:30:00 PM**

Font: Italic

**Page 2: [17] Deleted**                      **Office 2004 Test Drive User**                      **8/3/2009 12:06:00 PM**

Moreover, the crude essential oils had the same potency as turmeric's other secondary metabolite, the curcuminoids, in this *in vitro* screening assay.

**Page 2: [18] Deleted**                      **Office 2004 Test Drive User**                      **8/3/2009 12:06:00 PM**

Thus, we have postulated that the essential oils of turmeric may also have significant medicinal anti-arthritic effects *in vivo*--independent of those attributed to tumeric's polyphenols—that result from synergistic actions of the oil's various constituents.

To test this postulate, *in vivo* studies described herein were undertaken to determine whether the essential oils of turmeric are indeed effective anti-arthritic agents using an animal model of rheumatoid arthritis (RA), streptococcal cell wall (SCW)-induced arthritis.

**Page 2: [19] Deleted**                      **Office 2004 Test Drive User**                      **8/3/2009 12:06:00 PM**

Because we previously used this

**Page 2: [20] Deleted**                      **Office 2004 Test Drive User**                      **8/3/2009 12:06:00 PM**

to characterize anti-inflammatory properties of essential-oil free, curcuminoid-containing turmeric extracts (3, 4), these experiments also allowed us to compare the relative *in vivo*

anti-inflammatory efficacy of each of turmeric's two major classes of secondary metabolites. Moreover,

**Page 2: [21] Formatted**                      **hankzhang**                      **7/22/2009 12:30:00 PM**

Font: Italic

**Page 2: [21] Formatted**                      **hankzhang**                      **7/22/2009 12:30:00 PM**

Font: Italic

**Page 2: [22] Deleted**                      **Office 2004 Test Drive User**                      **8/3/2009 12:06:00 PM**

our isolation and *in vivo* testing of two complex TEO extracts, a crude hexane extract and a curcuminoid-stripped, refined fraction of the crude TEO extract, also allowed for clarification of the independent role of the essential oils (vs. curcuminoids) in preventing intra-articular inflammation.

**Page 2: [23] Deleted**                      **Office 2004 Test Drive User**                      **8/3/2009 12:06:00 PM**

-----Page Break-----

**Page 2: [24] Deleted**                      **Office 2004 Test Drive User**                      **8/3/2009 12:06:00 PM**

## **MATERIALS AND METHODS**

### **Turmeric Essential Oil Preparation.**

**Page 2: [25] Deleted**                      **Office 2004 Test Drive User**                      **8/3/2009 12:06:00 PM**

Turmeric essential oil (TEO) extracts were isolated from dry turmeric rhizome powder as described in detail in United States Patent 7,205,011.

**Page 2: [26] Deleted**                      **Office 2004 Test Drive User**                      **8/3/2009 12:06:00 PM**

In brief, a crude TEO extract was prepared from dry *Curcuma longa* L., Zingiberaceae rhizome powder (San Francisco Herb, SF, CA) by n-hexane extraction at room temperature for 24 hours.

**Page 2: [27] Deleted**                      **Office 2004 Test Drive User**                      **8/3/2009 12:06:00 PM**

The resultant mixture was filtered, the filtrate was combined with an n-hexane wash of the marc, and the solvent was stripped under vacuum for 24 hours to obtain a crude turmeric oil extract (yield, 3.7%).

**Page 2: [28] Deleted**                      **Office 2004 Test Drive User**                      **8/3/2009 12:06:00 PM**

HPLC analysis revealed minor curcuminoid contamination of this essential oil-enriched extract. The crude TEO was processed further by silica gel column chromatography.

**Page 2: [29] Deleted**                      **Office 2004 Test Drive User**                      **8/3/2009 12:06:00 PM**

Elution was by the gravity method. The column was eluted with n-hexane (100%). Fractions (25-30 ml each) were collected until the color of the eluant changed from colorless to yellow to colorless again. The column was then eluted with a mixture of n-hexane

**Page 2: [30] Deleted**                      **Office 2004 Test Drive User**                      **8/3/2009 12:06:00 PM**

and ethyl acetate (17:1 v/v) for a total of 15 L. The column was finally leached with 100% ethyl acetate (1 L) and elution was discontinued. The solvent from the 15 L fraction was stripped off under vacuum using a rotary evaporator, and the resulting refined TEO was then left under vacuum for a minimum of 24 hrs (66-74% yield, by weight).

Page 2: [31] Deleted Office 2004 Test Drive User 8/3/2009 12:06:00 PM

### Chemical Analysis of Turmeric Essential Oil Extract

Page 1: [32] Formatted hankzhang 7/22/2009 12:03:00 PM

After: 18 pt

Page 9: [33] Deleted Janet Funk 11/16/2009 11:51:00 PM

Page 9: [33] Deleted Janet Funk 11/16/2009 11:51:00 PM

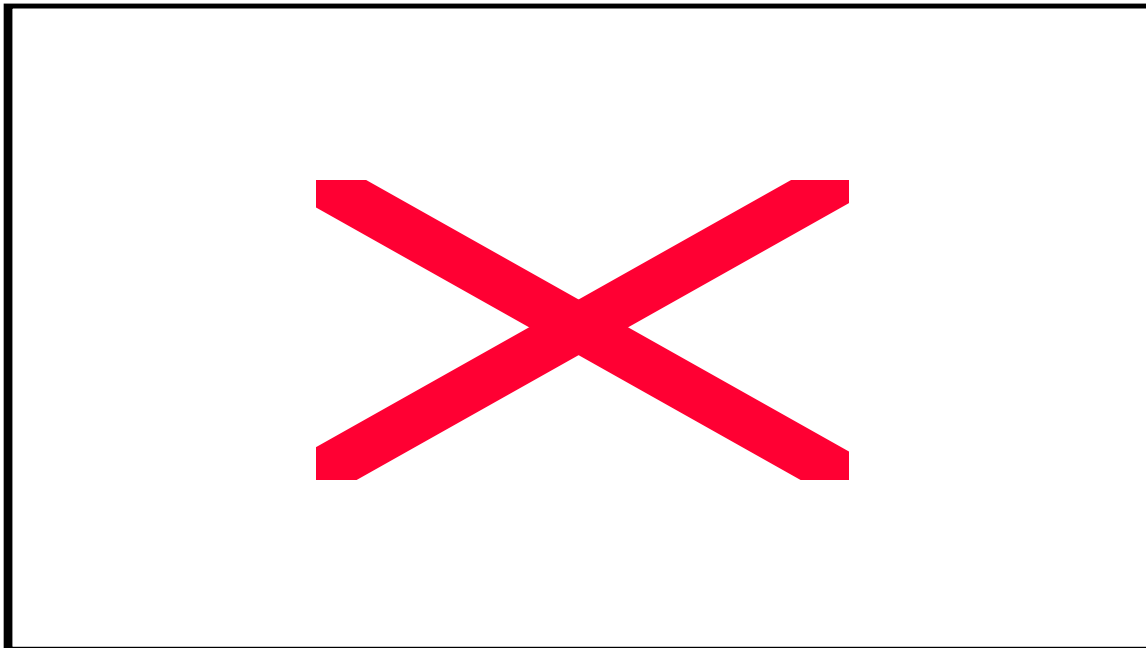

A

B

Page 9: [34] Deleted Office 2004 Test Drive User 8/3/2009 12:54:00 PM

tumerone

**Page 9: [34] Deleted**                      **Office 2004 Test Drive User**                      **8/3/2009 12:54:00 PM**  
tumerone

**Page 9: [34] Deleted**                      **Office 2004 Test Drive User**                      **8/3/2009 12:54:00 PM**  
tumerone

**Page 9: [34] Deleted**                      **Office 2004 Test Drive User**                      **8/3/2009 12:54:00 PM**  
tumerone

**Page 9: [34] Deleted**                      **Office 2004 Test Drive User**                      **8/3/2009 11:54:00 AM**

**Page 9: [34] Deleted**                      **Office 2004 Test Drive User**                      **8/3/2009 12:54:00 PM**  
tumerone

**Page 9: [34] Deleted**                      **Office 2004 Test Drive User**                      **8/3/2009 11:53:00 AM**

**Page 9: [34] Deleted**                      **Office 2004 Test Drive User**                      **8/3/2009 11:53:00 AM**  
(2)

**Page 9: [34] Deleted**                      **Office 2004 Test Drive User**                      **8/3/2009 11:53:00 AM**  
is

**Page 9: [35] Deleted**                      **hankzhang**                      **7/22/2009 12:24:00 PM**

-----Page Break-----

## Literature Cited

Pichersky, E. and Gang, D.R. Genetics and biochemistry of secondary metabolites in plants: an evolutionary perspective. Trends Plant Sci. 2000, 5, 439-445.

Lantz, R.C.; Chen, G.J.; Solyom, A.M.; Jolad, S.D.; Timmermann, B.N. The effect of turmeric extracts on inflammatory mediator production. Phytomedicine 2005, 12, 445-452.



Funk, J.L.; Frye, J.B.; Oyarzo, J.N.; Kuscuoglu, N.; Wilson, J.; McCaffrey, G.; Stafford, G.; Chen, G.; Lantz, R.C.; Jolad, S.D.; Solyom, A.M.; Kiela, P.R.; Timmermann, B.N. Efficacy and mechanism of action of turmeric supplements in the treatment of experimental arthritis. *Arthritis Rheum.* 2006, 54, 3452-3464.

Funk, J.L.; Oyarzo, J.N.; Frye, J.B.; Chen, G.; Lantz, R.C.; Jolad, S.D.; Solyom, A.M.; Timmermann, B.N. Turmeric extracts containing curcuminoids prevent experimental rheumatoid arthritis. *J. Nat. Prod.* 2006, 69, 351-355.

Chainani-Wu, N. Safety and anti-inflammatory activity of curcumin: a component of tumeric (*Curcuma longa*). *J. Altern. Complement. Med.* 2003, 9, 161-168.

Apisariyakul, A.; Vanittanakom, N.; Buddhasukh, D. Antifungal activity of turmeric oil extracted from *Curcuma longa* (Zingiberaceae). *J. Ethnopharmacol.* 1995, 49, 163-169.

Roth, G.N.; Chandra, A.; Nair, M.G. Novel bioactivities of *Curcuma longa* constituents. *J. Nat. Prod.* 1998, 61, 542-545.

Ferreira, L.A.; Henriques, O.B.; Andreoni, A.A.; Vital, G.R.; Campos, M.M.; Habermehl, G.G.; de Moraes, V.L. Antivenom and biological effects of ar-turmerone isolated from *Curcuma longa* (Zingiberaceae)[erratum appears in *Toxicon* 1992 Dec;30(12):1637]. *Toxicon* 1992, 30, 1211-1218.

Negi, P.S.; Jayaprakasha, G.K.; Jagan Mohan Rao, L.; Sakariah, K.K. Antibacterial activity of turmeric oil: a byproduct from curcumin manufacture. *J. Agric. Food Chem.* 1999, 47, 4297-4300.

Jayaprakasha, G.K.; Jena, B.S.; Negi, P.S.; Sakariah, K.K. Evaluation of antioxidant activities and antimutagenicity of turmeric oil: a byproduct from curcumin production. *Z. Naturforsch. [C]*. 2002, 57, 828-835.

Rathore, P.; Dohare, P.; Varma, S.; Ray, A.; Sharma, U.; Jagannathan, N.R.; Ray, M. Curcuma oil: reduces early accumulation of oxidative product and is anti-apoptogenic in transient focal ischemia in rat brain. *Neurochem. Res.* 2008, 33, 1672-1682.

Dohare, P.; Garg, P.; Sharma, U.; Jagannathan, N.R.; Ray, M. Neuroprotective efficacy and therapeutic window of curcuma oil: in rat embolic stroke model. *BMC Altern. Med.* 2008, 8, 55.

Dohare, P.; Varma, S.; Ray, M. Curcuma oil modulates the nitric oxide system response to cerebral ischemia/reperfusion injury. *Nitric Oxide* 2008, 19, 1-11.

Nishiyama, T.; Mae, T.; Kishida, H.; Tsukagawa, M.; Mimaki, Y.; Kuroda, M.; Sashida, Y.; Takahashi, K.; Kawada, T.; Nakagawa, K.; Kitahara, M. Curcuminoids and sesquiterpenoids in turmeric (*Curcuma longa* L.) suppress an increase in blood glucose level in type 2 diabetic KK-Ay mice. *J. Agric. Food Chem.* 2005, 53, 959-963.

Honda, S.; Aoki, F.; Tanaka, H.; Kishida, H.; Nishiyama, T.; Okada, S.; Matsumoto, I.; Abe, K.; Mae, T. Effects of ingested turmeric oleoresin on glucose and lipid metabolisms in obese diabetic mice: a DNA microarray study. *J. Agric. Food Chem.* 2006, 54, 9055-9062.

Jain, V.; Prasad, V.; Pal, R.; Singh, S. Standardization and stability studies of neuroprotective lipid soluble fraction obtained from *Curcuma longa*. *J. Pharm. Biomed. Anal.* 2007, 44, 1079-1086.

Joshi, J.; Ghaisas, S.; Vaidya, A.; Vaidya, R.; Kamat, D.V.; Bhagwat, A.N.; Bhide, S. Early human safety study of turmeric oil (*Curcuma longa* oil) administered orally in healthy volunteers. *J. Assoc. Physicians India* 2003, 51, 1055-1060.

Ji, M.; Choi, J.; Lee, J.; Lee, Y. Induction of apoptosis by ar-turmerone on various cell lines. *Int. J. Mol. Med.* 2004, 14, 253-256.

Aratanechemuge, Y.; Komiya, T.; Moteki, H.; Katsuzaki, H.; Imai, K.; Hibasami, H. Selective induction of apoptosis by ar-turmerone isolated from turmeric (*Curcuma longa* L) in two human leukemia cell lines, but not in human stomach cancer cell line. *Int. J. Mol. Med.* 2002, 9, 481-484.

Hong, C.H.; Noh, M.S.; Lee, W.Y.; Lee, S.K. Inhibitory effects of natural sesquiterpenoids isolated from the rhizomes of *Curcuma zedoaria* on prostaglandin E2 and nitric oxide production. *Planta Med.* 2002, 68, 545-547.

Lee, S.K.; Hong, C.H.; Huh, S.K.; Kim, S.S.; Oh, O.J.; Min, H.Y.; Park, K.K.; Chung, W.Y.; Hwang, J.K. Suppressive effect of natural sesquiterpenoids on inducible cyclooxygenase (COX-2) and nitric oxide synthase (iNOS) activity in mouse macrophage cells. *J. Environ. Pathol. Toxicol. Oncol.* 2002, 21, 141-148.

Lee, H.S. Antiplatelet property of *Curcuma longa* L. rhizome-derived ar-turmerone. *Bioresour. Technol.* 2006, 97, 1372-1376.

Funk, J.L.; Chen, J.; Downey, K.J.; Davee, S.M.; Stafford, G. Blockade of parathyroid hormone-related protein prevents joint destruction and granuloma formation in streptococcal cell wall-induced arthritis. *Arthritis Rheum.* 2003, 48, 1721-1731.

Funk, J.L.; Chen, J.; Downey, K.J.; Clark, R.A. Bone protective effect of simvastatin in experimental arthritis. *J. Rheumatol.* 2008, 35, 1083-1091.

Bendele, A.M.; Chlipala, E.S.; Scherrer, J.; Frazier, J.; Sennello, G.; Rich, W.J.; Edwards, C.K.,3rd Combination benefit of treatment with the cytokine inhibitors

interleukin-1 receptor antagonist and PEGylated soluble tumor necrosis factor receptor type I in animal models of rheumatoid arthritis. *Arthritis Rheum.* 2000, 43, 2648-2659.

Funk, J.L.; Trout, C.R.; Wei, H.; Stafford, G.; Reichlin, S. Parathyroid hormone-related protein (PTHrP) induction in reactive astrocytes following brain injury: a possible mediator of CNS inflammation. *Brain Res.* 2001, 915, 195-209.

Solomon, S.; Kassahn, D.; Illges, H. The role of the complement and the Fc gamma R system in the pathogenesis of arthritis. *Arthritis Res. Ther.* 2005, 7, 129-135.

Geratz, J.D.; Tidwell, R.R.; Schwab, J.H.; Anderle, S.K.; Pryzwansky, K.B. Sequential events in the pathogenesis of streptococcal cell wall-induced arthritis and their modulation by bis(5-amidino-2-benzimidazolyl)methane (BABIM). *Am. J. Pathol.* 1990, 136, 909-921.

Kohlert, C.; van Rensen, I.; Marz, R.; Schindler, G.; Graefe, E.U.; Veit, M.

Bioavailability and pharmacokinetics of natural volatile terpenes in animals and humans. *Planta Med.* 2000, 66, 495-505.

Kobayashi, K.S. and Flavell, R.A. Shielding the double-edged sword: negative regulation of the innate immune system. *J. Leukoc. Biol.* 2004, 75, 428-433.

Joosten, L.A.; Koenders, M.I.; Smeets, R.L.; Heuvelmans-Jacobs, M.; Helsen, M.M.;

Takeda, K.; Akira, S.; Lubberts, E.; van de Loo, F.A.; van den Berg, W.B. Toll-like receptor 2 pathway drives streptococcal cell wall-induced joint inflammation: critical role of myeloid differentiation factor 88. *J. Immunol.* 2003, 171, 6145-6153.

Freireich, E.J.; Gehan, E.A.; Rall, D.P.; Schmidt, L.H.; Skipper, H.E. Quantitative comparison of toxicity of anticancer agents in mouse, rat, hamster, dog, monkey, and man. *Cancer Chemother. Rep.* 1966, 50, 219; May-244.

Antony, B.; Merina, B.; Iyer, V.S.; Judy, N.; Lennertz, K.; Joyal, S. A Pilot Cross-Over Study to Evaluate Human Oral Bioavailability of BCM-95 (R) CG (Biocurcumax (TM)), A Novel Bioenhanced Preparation of Curcumin. *Indian J. Pharm. Sci.* 2008, 70, 445-449.
